# Supplementary material for: Neoadjuvant Treatment with Angiogenesis‐Inhibitor Dovitinib Prior to Local Therapy in Hepatocellular Carcinoma: A Phase II Study
Source: PubMed Central journal article supplement — Oncologist. 2021 Aug 4;26(10):854–64. doi: 10.1002/onco.13901 (PMC8488766; doi:10.1002/onco.13901), 2021-08-04
Supplement: ONCO-26-854-s002.pdf [file ONCO-26-854-s002.pdf]

Supplemental Tables for: “Neoadjuvant treatment with angiogenesis-inhibitor dovitinib prior to local therapy in hepatocellular carcinoma: a phase 2 study - F.J. Sherida H. Woei-A-Jin, *et al.*”

| <b>Supplemental Table 1. Full list of inclusion and exclusion criteria</b> |                                                                                                                                                                                                                                                                                                                                                                                                                                                                                                                                                                                                                                                                                                                                                                                                                                                                                                                                                                                                                                                                                                                                                                                                                                                                                                                                                                                                                                                                                                                                                                                                                                                                                                         |
|----------------------------------------------------------------------------|---------------------------------------------------------------------------------------------------------------------------------------------------------------------------------------------------------------------------------------------------------------------------------------------------------------------------------------------------------------------------------------------------------------------------------------------------------------------------------------------------------------------------------------------------------------------------------------------------------------------------------------------------------------------------------------------------------------------------------------------------------------------------------------------------------------------------------------------------------------------------------------------------------------------------------------------------------------------------------------------------------------------------------------------------------------------------------------------------------------------------------------------------------------------------------------------------------------------------------------------------------------------------------------------------------------------------------------------------------------------------------------------------------------------------------------------------------------------------------------------------------------------------------------------------------------------------------------------------------------------------------------------------------------------------------------------------------|
| <b>Inclusion criteria</b>                                                  |                                                                                                                                                                                                                                                                                                                                                                                                                                                                                                                                                                                                                                                                                                                                                                                                                                                                                                                                                                                                                                                                                                                                                                                                                                                                                                                                                                                                                                                                                                                                                                                                                                                                                                         |
| 1.                                                                         | Hepatocellular carcinoma diagnosis based on cytology, histology or multi-phasic contrast-enhanced computed tomography (CT) showing typical vascular hallmarks of HCC (hypervascularity in arterial phase, washout in portal venous or delayed phase)                                                                                                                                                                                                                                                                                                                                                                                                                                                                                                                                                                                                                                                                                                                                                                                                                                                                                                                                                                                                                                                                                                                                                                                                                                                                                                                                                                                                                                                    |
| 2.                                                                         | HCC stage 0, A or B according to Barcelona Clinic Liver Cancer staging classification (i.e. T1-3N0M0 according to 8 <sup>th</sup> edition UICC staging system without impaired cancer-related ECOG performance status (PS))                                                                                                                                                                                                                                                                                                                                                                                                                                                                                                                                                                                                                                                                                                                                                                                                                                                                                                                                                                                                                                                                                                                                                                                                                                                                                                                                                                                                                                                                             |
| 3.                                                                         | Patients eligible for local therapy, i.e. radiofrequency ablation, chemo-embolization, or surgical resection                                                                                                                                                                                                                                                                                                                                                                                                                                                                                                                                                                                                                                                                                                                                                                                                                                                                                                                                                                                                                                                                                                                                                                                                                                                                                                                                                                                                                                                                                                                                                                                            |
| 4.                                                                         | ECOG PS 0, 1, or 2 (however, no cancer-related symptoms: i.e. cancer-related PS 0)                                                                                                                                                                                                                                                                                                                                                                                                                                                                                                                                                                                                                                                                                                                                                                                                                                                                                                                                                                                                                                                                                                                                                                                                                                                                                                                                                                                                                                                                                                                                                                                                                      |
| 5.                                                                         | Age $\geq$ 18 years old                                                                                                                                                                                                                                                                                                                                                                                                                                                                                                                                                                                                                                                                                                                                                                                                                                                                                                                                                                                                                                                                                                                                                                                                                                                                                                                                                                                                                                                                                                                                                                                                                                                                                 |
| 6.                                                                         | At least one unidimensional measurable lesion. Lesions must be measured by CT-scan or MRI-scan.                                                                                                                                                                                                                                                                                                                                                                                                                                                                                                                                                                                                                                                                                                                                                                                                                                                                                                                                                                                                                                                                                                                                                                                                                                                                                                                                                                                                                                                                                                                                                                                                         |
| 7.                                                                         | Patients must have adequate bone marrow, liver and renal function: <ul style="list-style-type: none"> <li>• Absolute neutrophil count (ANC) <math>\geq</math> <math>1.5 \times 10^9/L</math></li> <li>• Platelets <math>\geq</math> <math>75 \times 10^9/L</math></li> <li>• Hemoglobin <math>\geq</math> 6.0 mmol/L</li> <li>• Serum total bilirubin: <math>\leq</math> 1.5 x ULN</li> <li>• Modified Child-Pugh score <math>\leq</math> 6 points, i.e. Child-Pugh class A or well-compensated liver disease, with no encephalopathy at time of screening.</li> <li>• ALT and AST <math>\leq</math> 3.0 x ULN (with or without liver metastases)</li> <li>• Serum creatinine <math>\leq</math> 1.5 x ULN or serum creatinine <math>&gt;</math> 1.5 – 3 x ULN if calculated creatinine clearance is <math>\geq</math> 30 mL/min according to the Cockcroft-Gault equation.</li> </ul>                                                                                                                                                                                                                                                                                                                                                                                                                                                                                                                                                                                                                                                                                                                                                                                                                   |
| 8.                                                                         | Life expectancy of at least 3 months                                                                                                                                                                                                                                                                                                                                                                                                                                                                                                                                                                                                                                                                                                                                                                                                                                                                                                                                                                                                                                                                                                                                                                                                                                                                                                                                                                                                                                                                                                                                                                                                                                                                    |
| 9.                                                                         | Patients who give a written informed consent obtained according to local guidelines                                                                                                                                                                                                                                                                                                                                                                                                                                                                                                                                                                                                                                                                                                                                                                                                                                                                                                                                                                                                                                                                                                                                                                                                                                                                                                                                                                                                                                                                                                                                                                                                                     |
| <b>Exclusion criteria</b>                                                  |                                                                                                                                                                                                                                                                                                                                                                                                                                                                                                                                                                                                                                                                                                                                                                                                                                                                                                                                                                                                                                                                                                                                                                                                                                                                                                                                                                                                                                                                                                                                                                                                                                                                                                         |
| 1.                                                                         | Presence or suspicion of brain metastases                                                                                                                                                                                                                                                                                                                                                                                                                                                                                                                                                                                                                                                                                                                                                                                                                                                                                                                                                                                                                                                                                                                                                                                                                                                                                                                                                                                                                                                                                                                                                                                                                                                               |
| 2.                                                                         | Another primary malignancy within 3 years prior to study drug initiation, with the exception of adequately treated in-situ carcinoma of the uterine cervix, non-melanoma skin cancer and superficial bladder tumors (Ta, Tis and T1)                                                                                                                                                                                                                                                                                                                                                                                                                                                                                                                                                                                                                                                                                                                                                                                                                                                                                                                                                                                                                                                                                                                                                                                                                                                                                                                                                                                                                                                                    |
| 3.                                                                         | Anticancer therapy $\leq$ 4 weeks prior to study drug initiation                                                                                                                                                                                                                                                                                                                                                                                                                                                                                                                                                                                                                                                                                                                                                                                                                                                                                                                                                                                                                                                                                                                                                                                                                                                                                                                                                                                                                                                                                                                                                                                                                                        |
| 4.                                                                         | Treatment with targeted therapy (e.g. sunitinib, sorafenib, pazopanib) within 2 weeks prior to study drug initiation                                                                                                                                                                                                                                                                                                                                                                                                                                                                                                                                                                                                                                                                                                                                                                                                                                                                                                                                                                                                                                                                                                                                                                                                                                                                                                                                                                                                                                                                                                                                                                                    |
| 5.                                                                         | Incomplete recovery of side effects from previous HCC treatments or interventions.                                                                                                                                                                                                                                                                                                                                                                                                                                                                                                                                                                                                                                                                                                                                                                                                                                                                                                                                                                                                                                                                                                                                                                                                                                                                                                                                                                                                                                                                                                                                                                                                                      |
| 6.                                                                         | Patients who have undergone major surgery (e.g. thoracic, abdominal or pelvic), open biopsy or significant traumatic injury $\leq$ 4 weeks prior to starting of the study drug, or patients who have undergone minor procedures $\leq$ 1 week prior to starting study drug.                                                                                                                                                                                                                                                                                                                                                                                                                                                                                                                                                                                                                                                                                                                                                                                                                                                                                                                                                                                                                                                                                                                                                                                                                                                                                                                                                                                                                             |
| 7.                                                                         | The following concurrent severe and/or uncontrolled medical conditions: <ul style="list-style-type: none"> <li>• Impaired cardiac function or clinically significant cardiac diseases, including any of the following: <ol style="list-style-type: none"> <li>a. History or presence of serious uncontrolled ventricular arrhythmias</li> <li>b. Clinically significant resting bradycardia</li> <li>c. LVEF assessed by 2-D echocardiogram <math>&lt;</math> 50% or multiple gated acquisition scan <math>&lt;</math> 45%</li> <li>d. Any of the following within 6 months prior to starting of the study drug: myocardial infarction, severe/unstable angina pectoris, coronary artery bypass graft, congestive heart failure, cerebrovascular accident, transient ischemic attack, pulmonary embolism.</li> <li>e. Uncontrolled hypertension defined by a SBP <math>\geq</math> 160 mm Hg and/or DBP <math>\geq</math> 100 mm Hg, with or without anti-hypertensive medication(s)</li> </ol> </li> <li>• Impairment of gastrointestinal function or disease that may significantly alter absorption of dovitinib (e.g. ulcerative diseases, uncontrolled nausea, vomiting, diarrhea, malabsorption syndrome, or small bowel resection)</li> <li>• Known diagnosis of human immunodeficiency virus infection (HIV testing is not mandatory)</li> <li>• Patients who are receiving anticoagulation treatment with therapeutic doses of warfarin at time of screening</li> <li>• Other concurrent severe and/or uncontrolled concomitant medical conditions (e.g. uncontrolled infection or diabetes) that could cause unacceptable safety risks or compromise compliance with the protocol.</li> </ul> |
| 8.                                                                         | Pregnant or lactating women                                                                                                                                                                                                                                                                                                                                                                                                                                                                                                                                                                                                                                                                                                                                                                                                                                                                                                                                                                                                                                                                                                                                                                                                                                                                                                                                                                                                                                                                                                                                                                                                                                                                             |
| 9.                                                                         | Women of child-bearing potential, not employing two forms of highly effective contraception.                                                                                                                                                                                                                                                                                                                                                                                                                                                                                                                                                                                                                                                                                                                                                                                                                                                                                                                                                                                                                                                                                                                                                                                                                                                                                                                                                                                                                                                                                                                                                                                                            |
| 10.                                                                        | Fertile males not willing to use contraception, as stated above.                                                                                                                                                                                                                                                                                                                                                                                                                                                                                                                                                                                                                                                                                                                                                                                                                                                                                                                                                                                                                                                                                                                                                                                                                                                                                                                                                                                                                                                                                                                                                                                                                                        |
| 11.                                                                        | Patients unwilling or unable to comply with the protocol                                                                                                                                                                                                                                                                                                                                                                                                                                                                                                                                                                                                                                                                                                                                                                                                                                                                                                                                                                                                                                                                                                                                                                                                                                                                                                                                                                                                                                                                                                                                                                                                                                                |

\* AST = aspartate transaminase. ALT = alanine transaminase. DBP = diastolic blood pressure. HCC = hepatocellular carcinoma. LVEF = left ventricular ejection fraction. ULN = upper limit of normal. SBP = systolic blood pressure.

**Supplemental Table 2. Dovitinib-related toxicity management guidelines**

|                                                               |                                                                                                                                                                               |
|---------------------------------------------------------------|-------------------------------------------------------------------------------------------------------------------------------------------------------------------------------|
| <b>Hypertension</b>                                           |                                                                                                                                                                               |
| SBP <160 and/or DBP <100 mHg                                  | Maintain dose level                                                                                                                                                           |
| SBP ≥160 and/or DBP ≥100 mHg                                  | Delay study treatment. Restart in conjunction with standard antihypertensive medication if BP is controlled: maintain or reduce dose at investigator's discretion.            |
| Urgent intervention indicated                                 | Discontinue dovitinib permanently                                                                                                                                             |
| <b>Other cardiovascular events</b>                            |                                                                                                                                                                               |
| Grade 1-2                                                     | Maintain dose level                                                                                                                                                           |
| Grade 3                                                       | Omit dose until resolved to ≤ grade 1, then reduce 1 dose level                                                                                                               |
| Grade 4                                                       | Discontinue study treatment                                                                                                                                                   |
| <b>Diarrhea</b> (despite max. anti-diarrheic treatment)       |                                                                                                                                                                               |
| Grade 1                                                       | Maintain dose level                                                                                                                                                           |
| Grade 2                                                       | Omit dose until resolved to ≤ grade 1, then restart at current dose level. If diarrhea returns as ≥ grade 2, then omit until resolved to ≤ grade 1, then reduce 1 dose level. |
| Grade 3-4                                                     | Omit dose until resolved to ≤ grade 1, then reduce 1 dose level                                                                                                               |
| <b>Nausea / Vomiting</b> (despite max. anti-emetic treatment) |                                                                                                                                                                               |
| Grade 1                                                       | Maintain dose level                                                                                                                                                           |
| Grade 2                                                       | Omit dose until resolved to ≤ grade 1, then restart at current dose level. If nausea returns as ≥ grade 2, then omit until resolved to ≤ grade 1, then reduce 1 dose level.   |
| Grade 3                                                       | Omit dose until resolved to ≤ grade 1, then reduce 1 dose level                                                                                                               |
| <b>Neutropenia</b>                                            |                                                                                                                                                                               |
| Grade 1-2                                                     | Maintain dose level                                                                                                                                                           |
| Grade 3-4                                                     | Omit dose until resolved to ≤ grade 2. Maintain dose level if resolved by ≤ 7 days. If resolved by > 7 days after suspending dovitinib, reduce 1 dose level.                  |
| <b>Thrombocytopenia</b>                                       |                                                                                                                                                                               |
| Grade 1                                                       | Maintain dose level                                                                                                                                                           |
| Grade 2                                                       | Maintain dose level                                                                                                                                                           |
| Grade 3-4                                                     | Omit dose until resolution to ≤ grade 1. Maintain dose level if resolved by ≤ 7 days. If resolved by > 7 days after suspending dovitinib, reduce 1 dose level.                |
| <b>Febrile neutropenia</b> ≥ Grade 3                          | Omit dose until resolved, then reduce 1 dose level                                                                                                                            |
| <b>Hemolytic anemia</b> ≥ Grade 3                             | Discontinue study treatment permanently                                                                                                                                       |
| <b>Lymphopenia</b> ≥ Grade 3                                  | Requires dose interruption until resolved to ≤ grade 1, then reduce 1 dose level                                                                                              |
| <b>Serum creatinine</b>                                       |                                                                                                                                                                               |
| Grade 1-2                                                     | Maintain dose level                                                                                                                                                           |
| Grade 3                                                       | Omit dose until resolved to ≤ grade 1, then reduce 1 dose level                                                                                                               |
| Grade 4                                                       | Discontinue study treatment permanently                                                                                                                                       |
| <b>Bilirubin</b>                                              |                                                                                                                                                                               |
| Grade 1                                                       | Maintain dose level                                                                                                                                                           |
| Grade 2                                                       | Maintain dose level                                                                                                                                                           |
| Grade 3-4                                                     | Discontinue study treatment permanently                                                                                                                                       |
| <b>AST or ALT*</b>                                            |                                                                                                                                                                               |
| Grade 1-2                                                     | Maintain dose level                                                                                                                                                           |
| Grade 3-4                                                     | Omit dose until resolved to ≤ grade 1 and reduce 1 dose level. Discontinue permanently if ALT or AST elevations > 3x upper limit of normal recur.                             |
| <b>Hand-foot syndrome</b>                                     |                                                                                                                                                                               |
| Grade 1-2                                                     | Maintain dose level                                                                                                                                                           |
| Grade 3                                                       | Omit dose until resolved to ≤ grade 1, then reduce 1 dose level                                                                                                               |
| Grade 4                                                       | Discontinue study treatment permanently                                                                                                                                       |
| <b>Other clinically significant AEs</b>                       |                                                                                                                                                                               |
| Grade 1-2                                                     | Maintain dose level                                                                                                                                                           |
| Grade 3 (except hyperlipidemia)                               | Omit dose until resolved to ≤ grade 1, then maintain dose level or reduce 1 dose level at the discretion of the investigator                                                  |
| Grade 4                                                       | Omit dose until resolved to ≤ grade 1, then maintain dose level or reduce 1 dose level at the discretion of the investigator                                                  |

Two dose reductions are allowed: 500 mg to 400 mg, and 400 mg to 300 mg. In case of dose interruption >21 days, the patient must be discontinued from the study. \* AST = aspartate transaminase. ALT = alanine transaminase. BP = blood pressure.

| <b>Supplemental Table 3. Radiographic tumor response to 1 cycle dovitinb (N = 24)</b> |                                     |                                      |                                     |                                      |
|---------------------------------------------------------------------------------------|-------------------------------------|--------------------------------------|-------------------------------------|--------------------------------------|
|                                                                                       | <b>BCLC stage 0</b><br><i>N = 3</i> | <b>BCLC stage A</b><br><i>N = 10</i> | <b>BCLC stage B</b><br><i>N = 9</i> | <b>BCLC stage C†</b><br><i>N = 2</i> |
| <b>RECIST 1.1.</b>                                                                    |                                     |                                      |                                     |                                      |
| Complete response                                                                     | -                                   | -                                    | -                                   | -                                    |
| Partial response                                                                      | 1 (33%)                             | -                                    | 1 (11%)                             | -                                    |
| Stable disease                                                                        | 2 (67%)                             | 10 (100%)                            | 8 (89%)                             | 2 (100%)                             |
| Progressive disease                                                                   | -                                   | -                                    | -                                   | -                                    |
| <b>mRECIST</b>                                                                        |                                     |                                      |                                     |                                      |
| Complete response                                                                     | 2 (67%)                             | -                                    | 1 (11%)                             | -                                    |
| Partial response                                                                      | -                                   | 7 (70%)                              | 1 (11%)                             | -                                    |
| Stable disease                                                                        | 1 (33%)                             | 2 (20%)                              | 7 (78%)                             | 2 (100%)                             |
| Progressive disease                                                                   | -                                   | -                                    | -                                   | -                                    |
| Not evaluable                                                                         | -                                   | 1 (10%)                              | -                                   | -                                    |

**Abbreviations:** BCLC: Barcelona Clinic Liver Cancer. HCC: hepatocellular carcinoma. (m)RECIST: (modified) Response Evaluation Criteria in Solid Tumors.

† Following study enrollment and dovitinib treatment, 2 patients in retrospect already had BCLC stage C at inclusion: one patient had extensive mesentery metastases at laparoscopy following tumor rupture prior to inclusion and one patient had aspecific 1-3 mm lung nodules, one of which later turned out to be a lung metastasis. This however does not preclude tumor response assessment according to RECIST 1.1 and mRECIST since all patients were systemic treatment-naive.

| <b>Supplemental Table 4. Treatment-emergent adverse events with frequencies <math>\geq 10\%</math></b> |                            |                            |                          |                          |
|--------------------------------------------------------------------------------------------------------|----------------------------|----------------------------|--------------------------|--------------------------|
| <b>Adverse events</b>                                                                                  | <b>Any grade<br/>N (%)</b> | <b>Grade 1-2<br/>N (%)</b> | <b>Grade 3<br/>N (%)</b> | <b>Grade 4<br/>N (%)</b> |
| Hypertension                                                                                           | 19 (79)                    | 6 (25)                     | 13 (54)                  | 0 (0)                    |
| Fatigue                                                                                                | 18 (75)                    | 12 (50)                    | 6 (25)                   | 0 (0)                    |
| Diarrhea                                                                                               | 15 (63)                    | 13 (54)                    | 2 (8)                    | 0 (0)                    |
| Nausea                                                                                                 | 11 (46)                    | 10 (42)                    | 1 (4)                    | 0 (0)                    |
| Abdominal pain                                                                                         | 10 (42)                    | 9 (38)                     | 1 (4)                    | 0 (0)                    |
| Headache                                                                                               | 10 (42)                    | 9 (38)                     | 1 (4)                    | 0 (0)                    |
| Dysphonia                                                                                              | 7 (29)                     | 7 (29)                     | 0 (0)                    | 0 (0)                    |
| Myalgia                                                                                                | 6 (25)                     | 6 (25)                     | 0 (0)                    | 0 (0)                    |
| Dizziness                                                                                              | 5 (21)                     | 5 (21)                     | 0 (0)                    | 0 (0)                    |
| Dyspnea                                                                                                | 5 (21)                     | 5 (21)                     | 0 (0)                    | 0 (0)                    |
| Fever                                                                                                  | 5 (21)                     | 5 (21)                     | 0 (0)                    | 0 (0)                    |
| Rash                                                                                                   | 5 (21)                     | 5 (21)                     | 0 (0)                    | 0 (0)                    |
| Vomiting                                                                                               | 5 (21)                     | 5 (21)                     | 0 (0)                    | 0 (0)                    |
| Weight loss                                                                                            | 5 (21)                     | 5 (21)                     | 0 (0)                    | 0 (0)                    |
| Cough                                                                                                  | 4 (17)                     | 4 (17)                     | 0 (0)                    | 0 (0)                    |
| Dry mouth                                                                                              | 4 (17)                     | 4 (17)                     | 0 (0)                    | 0 (0)                    |
| Palmar-plantar erythrodysesthesia                                                                      | 4 (17)                     | 4 (17)                     | 0 (0)                    | 0 (0)                    |
| Confusion                                                                                              | 3 (13)                     | 1 (4)                      | 1 (4)                    | 1 (4)                    |
| Oral mucositis                                                                                         | 3 (13)                     | 2 (8)                      | 1 (4)                    | 0 (0)                    |
| Anorexia (decreased appetite)                                                                          | 3 (13)                     | 3 (13)                     | 0 (0)                    | 0 (0)                    |
| Constipation                                                                                           | 3 (13)                     | 3 (13)                     | 0 (0)                    | 0 (0)                    |
| Pruritus                                                                                               | 3 (13)                     | 3 (13)                     | 0 (0)                    | 0 (0)                    |
| <b>Laboratory abnormalities</b>                                                                        |                            |                            |                          |                          |
| Thrombocytopenia                                                                                       | 13 (54)                    | 8 (33)                     | 5 (21)                   | 0 (0)                    |
| Elevated alanine transferase                                                                           | 13 (54)                    | 12 (50)                    | 1 (4)                    | 0 (0)                    |
| Elevated aspartate transferase                                                                         | 12 (50)                    | 9 (38)                     | 3 (13)                   | 0 (0)                    |
| Elevated total bilirubin                                                                               | 8 (33)                     | 6 (25)                     | 2 (8)                    | 0 (0)                    |
| Hypertriglyceridemia                                                                                   | 7 (29)                     | 6 (25)                     | 1 (4)                    | 0 (0)                    |
| Leukopenia                                                                                             | 3 (13)                     | 2 (8)                      | 1 (4)                    | 0 (0)                    |
| Lymphopenia                                                                                            | 3 (13)                     | 2 (8)                      | 1 (4)                    | 0 (0)                    |
